# Supplementary material for: Strength Performance Across the Oral Contraceptive Cycle of Team Sport Athletes: A Cross-Sectional Study
Source: Front Physiol. 2021 Jul 1;12:658994. doi: 10.3389/fphys.2021.658994 (PMC8281678; doi:10.3389/fphys.2021.658994)
Supplement: Supplementary file 1 [file Table_1.XLSX]

## Sheet: Tabelle1
Brandname	Estradiol (mg)	Gestoden (mg)
Dienorette	0.03	2
Selina	0.03	0.15
Selina mite	0.02	0.1
Yris mite	0.02	0.075
Diane mite	0.035	2
Belara	0.03	2
Lenea	0.02	0.075
Eloine	0.02	3
Alisma	0.035	2
Madonella mite	0.02	0.1
Midane	0.035	2
